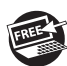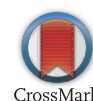

COMMENT ON ANJANA ET AL.

# Incidence of Diabetes and Prediabetes and Predictors of Progression Among Asian Indians: 10-Year Follow-up of the Chennai Urban Rural Epidemiology Study (CURES). *Diabetes Care* 2015;38:1441–1448

Keishi Yamauchi and Toru Aizawa

*Diabetes Care* 2016;39:e65 | DOI: 10.2337/dc15-2576

Anjana et al. (1) analyzed the rate of worsening of glucose metabolism in subjects with normal glucose tolerance (NGT) and impaired fasting glucose (IFG)/impaired glucose tolerance (IGT), the rate of regression from abnormal glucose metabolism to NGT, and the risk factors for the worsening in an Asian Indian cohort. The study may be a valuable addition to the previously accumulated knowledge in the epidemiology of the diabetes evolution. However, we are afraid that the classification of glucose tolerance categories and terminology were confusing and misleading in their study. Namely, the current definition of prediabetes by the American Diabetes Association is fasting plasma glucose (FPG) of 100–125 mg/dL (5.6–6.9 mmol/L), 2-h plasma glucose (PG) during 75-g oral glucose tolerance test of 140–199 mg/dL (7.8–11.0 mmol/L), or HbA<sub>1c</sub> of 5.7–6.4% (39–64 mmol/mol) (2). Although Anjana et al. (1) determined HbA<sub>1c</sub> at the baseline and the follow-up, the values were not used for the classification of the participants by the authors. Instead, the authors used prediabetes as a synonym for IFG/IGT. That is, they defined prediabetes as “FPG 100–125 mg/dL (5.6–6.9 mmol/L) or 2-h PG 140–199 mg/dL (7.8–11.0 mmol/L),” so that the participants were classified as prediabetes irrespective of HbA<sub>1c</sub> levels if the glucose criteria were fulfilled (1). The reason(s) why they did

not conform to the standard definition of prediabetes was not provided.

The difference between the two prediabetes definitions, i.e., categorization with and without adoption of HbA<sub>1c</sub>, is not negligible, as reported previously (3,4). Namely, approximately 15% of subjects with HbA<sub>1c</sub> 5.7–6.4% (39–64 mmol/mol) have FPG <100 mg/dL (5.6 mmol/L) or 2-h PG <140 mg/dL (7.8 mmol/L) (3,4). The value, 15%, was obtained by calculation on the basis of mean and SE (3) or SD (4) of FPG and 2-h PG of subjects with HbA<sub>1c</sub> 5.7–6.4% (39–64 mmol/mol) in these studies. In the study by Anjana et al. (1), existence of this subset of subjects with prediabetes was neglected and such individuals were treated as NGT. Importantly, correlation between HbA<sub>1c</sub> and 2-h PG was not significant in subjects without diabetes (3),  $\beta$ -cell function was worse in subjects with “isolated IFG plus HbA<sub>1c</sub> 5.7–6.4% (39–64 mmol/mol)” compared with those with isolated IFG alone (4), and HbA<sub>1c</sub> 5.7–6.4% (39–64 mmol/mol) was less sensitive than IFG and IGT for the detection of subjects with increased risk for development of diabetes (3). These facts imply that groups of subjects captured by the two diagnostic criteria of prediabetes are pathophysiologically dissimilar. We consider the use of prediabetes as a synonym for IFG/IGT as inappropriate and misleading, if not totally wrong.

In fact, the term prediabetes has been used to denote different subsets of subjects with nondiabetic hyperglycemia by other researchers, too (5). Investigators should explain why they used their own definition of prediabetes to the readers if they used nonstandard definitions. We believe now is the time to standardize the use of “prediabetes.”

**Duality of Interest.** No potential conflicts of interest relevant to this article were reported.

## References

1. Anjana RM, Shanthi Rani CS, Deepa M, et al. Incidence of diabetes and prediabetes and predictors of progression among Asian Indians: 10-year follow-up of the Chennai Urban Rural Epidemiology Study (CURES). *Diabetes Care* 2015;38:1441–1448
2. American Diabetes Association. Diagnosis and classification of diabetes mellitus. *Diabetes Care* 2013;36(Suppl. 1):S67–S74
3. Lorenzo C, Wagenknecht LE, Hanley AJ, Rewers MJ, Karter AJ, Haffner SM. A1C between 5.7 and 6.4% as a marker for identifying prediabetes, insulin sensitivity and secretion, and cardiovascular risk factors: the Insulin Resistance Atherosclerosis Study (IRAS). *Diabetes Care* 2010;33:2104–2109
4. Li C, Yang H, Tong G, et al. Correlations between A1c, fasting glucose, 2h postload glucose, and  $\beta$ -cell function in the Chinese population. *Acta Diabetol* 2014;51:601–608
5. Bansal N. Prediabetes diagnosis and treatment: a review. *World J Diabetes* 2015;6:296–303

Diabetes Center, Aizawa Hospital, Matsumoto, Japan

Corresponding author: Toru Aizawa, [taizawa@ai-hosp.or.jp](mailto:taizawa@ai-hosp.or.jp).

© 2016 by the American Diabetes Association. Readers may use this article as long as the work is properly cited, the use is educational and not for profit, and the work is not altered.
